# Supplementary material
Source: PubMed Central journal article supplement (PMC6580445)
Supplement: jamainternmed-179-1176-s001.pdf [file jamainternmed-179-1176-s001.pdf]

## Supplementary Online Content

Pack QR, Priya A, Lagu T, et al. Association between inpatient echocardiography use and outcomes in adult patients with acute myocardial infarction. *JAMA Intern Med*. Published online June 17, 2019. doi:10.1001/jamainternmed.2019.1051

**eMethods.** Sensitivity Analyses

**eResults.** Sensitivity Results

**eTable 1.** Patient Characteristics and Unadjusted Outcomes by Use of Echocardiography at Hospitals with At Least 25 Admissions for Acute Myocardial Infarction

**eTable 2.** Risk Standardized Model

**eTable 3.** Death and Echo Rates by Patient Hospital Length of Stay

**eTable 4.** Sensitivity Analysis Cohorts

**eTable 5.** Patient Characteristics and Unadjusted Outcomes By Use of Echocardiography When Excluding Length of Stay  $\leq 2$  Days

**eTable 6.** Sensitivity Analysis Excluding Patients with Hospital Length of Stay of  $\leq 2$  days

**eTable 7.** Sensitivity Analysis Excluding Hospital Transfers

**eTable 8.** Sensitivity Analysis by Catheterization and Revascularization Subgroups

This supplementary material has been provided by the authors to give readers additional information about their work.



## eMethods - Sensitivity Analyses

In addition to our primary analysis, we performed several sensitivity analyses. First, we excluded patients with  $\leq 2$  days length of stay in the hospital in effort to avoid immortal time bias, as done previously.<sup>1</sup> This eliminated patients who may not have had lived long enough to undergo an echo and increased the likelihood that echo was performed before any patient deaths. This also excluded patients well enough for discharge after only 1 night in the hospital and helps avoid immortal time bias. Second, we excluded any patient with a transfer in or out of the hospital. We did not initially exclude these patients because we were primarily interested in hospital-level practice patterns in echo use, but eliminating this group assured that all echo tests and outcomes occurred at the same hospital. Third, given that the ICD-9 code of 410.x does not reliably distinguish between ST-segment elevation and non-ST-segment elevation myocardial infarction,<sup>2</sup> we examined the population by cardiac catheterization and revascularization sub-groups; procedures which are reliably recorded in Premier. This included 1) cardiac catheterization with subsequent revascularization with either percutaneous coronary intervention or coronary artery bypass graft surgery, 2) patients who underwent cardiac catheterization without revascularization, and 3) patients that had neither cardiac catheterization nor underwent revascularization. For these sub-group analyses, multiple hospitals were excluded, so we divided hospitals into tertiles instead of quartiles.

1. Hernandez AF, Velazquez EJ, Solomon SD, et al. Left ventricular assessment in myocardial infarction: the VALIANT registry. *Arch Intern Med.* Oct 10 2005;165(18):2162-2169.
2. Steinberg BA, French WJ, Peterson E, Frederick PD, Cannon CP, National Registry of Myocardial Infarction I. Is coding for myocardial infarction more accurate now that coding descriptions have been clarified to distinguish ST-elevation myocardial infarction from non-ST elevation myocardial infarction? *Am J Cardiol.* Sep 1 2008;102(5):513-517.

### eResults - *Sensitivity Results*

Of all deaths in the cohort, 36% occurred on the first day of the hospitalization when echo use among those with mortality was lowest (39.7%). (eTable 3) However, by hospital day 3, the majority of deaths had now had an echo (80.4%), which indicates that many of the patients who died likely did not live long enough to undergo an echo. Given this finding, we then performed a sensitivity analysis excluding patients with length of stay  $\leq 2$  days. This exclusion also removed more than 30,000 patients who were low acuity and were discharged quickly. (eTable 4.) After excluding these patients, the median hospital echo use rate rose to 81.7%. Compared to patients without an echo, patients who underwent an echo continued to have significantly higher comorbidity burden and great utilization of critical care therapies. (eTable 5) However, unlike the full cohort, unadjusted mortality rates now shifted directions, such that the performance of an echo was associated with an unadjusted higher mortality rate (4.4 vs 2.6% in echo vs. no echo respectively,  $p < 0.001$ , eTable 5). Outcomes remained essentially unchanged, and after risk standardization and adjustment for residual imbalance in patient and hospital factors, we observed no difference between hospitals in mortality or 3-month readmission but costs remained higher among high RSecho hospitals. (eTable 6).

In other sensitivity analyses, the exclusion of hospital transfers removed 25,805 (27.0%) patients, but showed essentially unchanged echo rates, unadjusted mortality rates, and similar outcomes pattern as the original cohort. (eTable 7.) When stratified by use of cardiac catheterization and revascularization, we noted significant differences in outcomes between these three populations. Patients without cardiac catheterization were approximately 3 times more likely to die, twice as likely to be readmitted, but had costs that were half those observed among patients who underwent revascularization with either CABG or PCI. (eTable 4 and 8.) However,

in all three subgroups, we continued to observe no differences in adjusted mortality rates when examined across RSecho rate tertiles, while costs and length of stay continued to be higher in hospitals with high RS echo use rates. (eTable 8.) Rates of 3-month readmission were not different among tertiles of RSecho among patients with cardiac catheterization and/or revascularization, but among patients who did not undergo a cardiac catheterization, we observed marginally lower odds of 3-month readmission, [OR (95% CI): 0.89 (0.80 – 0.99),  $p = 0.04$  for tertile 3 vs. tertile 1].

eTable. 1. Patient Characteristics and Unadjusted Outcomes by Use of Echocardiography at Hospitals with At Least 25 Admissions for Acute Myocardial Infarction

| Description                             | Total              | No ECHO             | ECHO                | Absolute standardized differences |
|-----------------------------------------|--------------------|---------------------|---------------------|-----------------------------------|
|                                         | n (%)              | n (%)               | n (%)               | %                                 |
| <b>Patients, n, (%)</b>                 | <b>98999 (100)</b> | <b>29347 (29.6)</b> | <b>69652 (70.4)</b> |                                   |
| Age, Mean (SD), years                   | 66.5 (13.6)        | 65.9 (13.4)         | 66.7 (13.7)         | 6.3                               |
| Median (IQR), years                     | 66 (57 - 77)       | 66 (56 - 76)        | 67 (57 - 78)        |                                   |
| <b>Female sex</b>                       | 37851 (38.2)       | 11157 (38)          | 26694 (38.3)        | 0.63                              |
| <b>Race/Ethnicity</b>                   |                    |                     |                     | 4.77                              |
| White                                   | 69566 (70.3)       | 20877 (71.1)        | 48689 (69.9)        |                                   |
| Black                                   | 10267 (10.4)       | 3060 (10.4)         | 7207 (10.3)         |                                   |
| Hispanic                                | 6378 (6.4)         | 1943 (6.6)          | 4435 (6.4)          |                                   |
| Other                                   | 12788 (12.9)       | 3467 (11.8)         | 9321 (13.4)         |                                   |
| <b>Marital status</b>                   |                    |                     |                     | 5.35                              |
| Married                                 | 45136 (45.6)       | 13788 (47)          | 31348 (45)          |                                   |
| Single                                  | 40774 (41.2)       | 12009 (40.9)        | 28765 (41.3)        |                                   |
| Other                                   | 13089 (13.2)       | 3550 (12.1)         | 9539 (13.7)         |                                   |
| <b>Insurance payor</b>                  |                    |                     |                     | 5.37                              |
| Medicare                                | 56990 (57.6)       | 16655 (56.8)        | 40335 (57.9)        |                                   |
| Medicaid                                | 8594 (8.7)         | 2463 (8.4)          | 6131 (8.8)          |                                   |
| Managed care                            | 19063 (19.2)       | 6020 (20.5)         | 13043 (18.7)        |                                   |
| Commercial-Indemnity                    | 5303 (5.3)         | 1497 (5.1)          | 3806 (5.5)          |                                   |
| Self pay                                | 5179 (5.2)         | 1625 (5.5)          | 3554 (5.1)          |                                   |
| Other                                   | 3870 (3.9)         | 1087 (3.7)          | 2783 (4)            |                                   |
| <b>Gagne combined comorbidity score</b> |                    |                     |                     |                                   |
| Mean (SD)                               | 2.03 (2.7)         | 1.6 (2.6)           | 2.2 (2.7)           | 22.11                             |
| Median (IQR)                            | 1 (0 - 4)          | 1 (0 - 3)           | 2 (0 - 4)           |                                   |
| <b>Comorbidities</b>                    |                    |                     |                     |                                   |
| Hypertension                            | 78590 (79.4)       | 23427 (79.8)        | 55163 (79.2)        | 1.56                              |
| Hypothyroidism                          | 12039 (12.2)       | 3457 (11.8)         | 8582 (12.3)         | 0.26                              |
| Congestive heart failure                | 31501 (31.8)       | 7287 (24.8)         | 24214 (34.8)        | 21.85                             |
| Chronic pulmonary disease               | 22633 (22.9)       | 6606 (22.5)         | 16027 (23)          | 1.19                              |
| Renal failure                           | 21038 (21.2)       | 5542 (18.9)         | 15496 (22.2)        | 8.33                              |
| Obesity                                 | 18466 (18.6)       | 5301 (18.1)         | 13165 (18.9)        | 2.16                              |
| Deficiency Anemias                      | 17709 (17.9)       | 4508 (15.4)         | 13201 (19)          | 9.54                              |
| Valvular disease                        | 15243 (15.4)       | 3168 (10.8)         | 12075 (17.3)        | 18.9                              |
| Diabetes                                | 39825 (40.2)       | 11779 (40.1)        | 28046 (40.3)        | 1.66                              |
| Peripheral vascular disease             | 12859 (13.0)       | 3657 (12.5)         | 9202 (13.2)         | 2.24                              |
| Depression                              | 9084 (9.2)         | 2772 (9.4)          | 6312 (9.1)          | 1.32                              |

|                                      |               |               |               |                 |
|--------------------------------------|---------------|---------------|---------------|-----------------|
| Other neurological disorders         | 6487 (6.5)    | 1749 (6)      | 4738 (6.8)    | 3.45            |
| Pulmonary circulation disease        | 6026 (6.1)    | 1197 (4.1)    | 4829 (6.9)    | 12.54           |
| <b>Critical care therapies</b>       |               |               |               |                 |
| Intensive/Intermediate care unit     | 53966 (54.5)  | 12859 (43.8)  | 41107 (59)    | 30.77           |
| Vasodilators                         | 37739 (38.1)  | 10447 (35.6)  | 27292 (39.2)  | 7.41            |
| Noninvasive ventilation              | 8105 (8.2)    | 1487 (5.1)    | 6618 (9.5)    | 17.13           |
| Invasive mechanical ventilation      | 15483 (15.6)  | 3384 (11.5)   | 12099 (17.4)  | 16.67           |
| Vasopressors                         | 19591 (19.8)  | 4368 (14.9)   | 15223 (21.9)  | 18.08           |
| Arterial line                        | 4109 (4.1)    | 1015 (3.5)    | 3094 (4.4)    | 5.05            |
| Intraaortic balloon pump             | 4399 (4.4)    | 830 (2.8)     | 3569 (5.1)    | 11.77           |
| Inotropes                            | 10445 (10.5)  | 2050 (7)      | 8395 (12.1)   | 17.33           |
| <b>Other cardiac tests/therapies</b> |               |               |               |                 |
| Nuclear imaging                      | 4743 (4.8)    | 874 (3.0)     | 3869 (5.5)    | 12.8            |
| Ventriculography                     | 1687 (1.7)    | 273 (0.9)     | 1414 (2.0)    | 9.1             |
| Cardiac magnetic resonance imaging   | 295 (0.3)     | 57 (0.2)      | 238 (0.3)     | 2.8             |
| <b>Procedures</b>                    |               |               |               |                 |
| Coronary artery bypass surgery       | 9402 (9.5)    | 2295 (7.8)    | 7107 (10.2)   | 8.33            |
| Percutaneous coronary intervention   | 46824 (47.3)  | 13962 (47.6)  | 32862 (47.2)  | 0.79            |
| Cardiac catheterization              | 74112 (74.9)  | 21405 (72.9)  | 52707 (75.7)  | 6.3             |
| <b>Acute Organ failure</b>           |               |               |               |                 |
| Respiratory                          | 10378 (10.5)  | 1957 (6.7)    | 8421 (12.1)   | 18.7            |
| Cardiac                              | 13244 (13.4)  | 2781 (9.5)    | 10463 (15.0)  | 17              |
| Renal                                | 17145 (17.3)  | 3397 (11.6)   | 13748 (19.7)  | 22.6            |
| Neurological                         | 5048 (5.1)    | 1045 (3.6)    | 4003 (5.7)    | 10.4            |
| Hematological                        | 5770 (5.8)    | 1258 (4.3)    | 4512 (6.5)    | 9.7             |
| Hepatic                              | 1501 (1.5)    | 226 (0.8)     | 1275 (1.8)    | 9.4             |
| Acidosis                             | 4835 (4.9)    | 951 (3.2)     | 3884 (5.6)    | 11.4            |
| <b>Outcomes</b>                      |               |               |               | <b>p-value*</b> |
| Length of stay†, mean (SD), days     | 4.6 (4.2)     | 3.3 (3.1)     | 5.1 (4.5)     | <0.001          |
| Total cost‡, mean (SD)               | 17813 (16287) | 13455 (11507) | 19646 (17602) | <0.001          |
| In-hospital mortality                | 4613 (4.8)    | 1524 (5.4)    | 3089 (4.5)    | <0.001          |
| 3 month readmission among survivors  | 17396 (18.4)  | 5266 (18.9)   | 12130 (18.2)  | 0.01            |

LOS = Length of stay; echo = echocardiography;

\*Generalized estimating (GEE) models accounting for patient clustering within hospitals

†Winsorized at 99<sup>th</sup> percentile

‡Winsorized at 1st and 99th pctl

eTable 2. Risk Standardized Model

| Patient characteristic                                         | Odds ratio | 95% Confidence Limits |             |
|----------------------------------------------------------------|------------|-----------------------|-------------|
|                                                                |            | Upper Limit           | Lower Limit |
| Age (for every 5 years)                                        | 0.99       | 0.98                  | 1.00        |
| <b>Insurance payor</b>                                         |            |                       |             |
| Medicare                                                       | Referent   |                       |             |
| Medicaid                                                       | 1.04       | 0.98                  | 1.11        |
| Managed care                                                   | 1.06       | 1.01                  | 1.11        |
| Commercial-Indemnity                                           | 1.09       | 1.02                  | 1.18        |
| Self pay                                                       | 1.11       | 1.03                  | 1.19        |
| Other                                                          | 1.18       | 1.08                  | 1.28        |
| <b>Gagne Combined Comorbidity score</b><br>(for every 5 units) | 1.69       | 1.56                  | 1.83        |
| <b>Comorbidities</b>                                           |            |                       |             |
| Hypertension                                                   | 1.05       | 1.01                  | 1.09        |
| Congestive heart failure                                       | 1.12       | 1.06                  | 1.18        |
| Chronic pulmonary disease                                      | 0.84       | 0.80                  | 0.87        |
| Renal failure                                                  | 0.66       | 0.62                  | 0.70        |
| Obesity                                                        | 1.09       | 1.04                  | 1.13        |
| Deficiency anemias                                             | 0.97       | 0.92                  | 1.01        |
| Valvular disease                                               | 1.58       | 1.50                  | 1.66        |
| Diabetes                                                       | 0.90       | 0.87                  | 0.93        |
| Peripheral vascular disease                                    | 0.88       | 0.84                  | 0.92        |
| Depression                                                     | 0.93       | 0.89                  | 0.98        |
| Other neurological disease                                     | 1.05       | 0.99                  | 1.12        |
| Pulmonary circulation disease                                  | 1.21       | 1.12                  | 1.31        |
| Liver disease                                                  | 0.92       | 0.82                  | 1.04        |
| Metastatic cancer                                              | 0.53       | 0.44                  | 0.64        |
| Blood loss                                                     | 1.33       | 1.10                  | 1.61        |
| Psychoses                                                      | 0.90       | 0.82                  | 1.00        |
| <b>Acute organ failure</b>                                     |            |                       |             |
| Respiratory                                                    | 1.41       | 1.32                  | 1.50        |
| Cardiac                                                        | 1.33       | 1.27                  | 1.40        |
| Renal                                                          | 1.58       | 1.50                  | 1.66        |
| Neurologic                                                     | 1.13       | 1.04                  | 1.23        |
| Hematological                                                  | 1.14       | 1.06                  | 1.23        |



eTable 3. Death and Echo Rates by Patient Hospital Length of Stay

| <b>Hospital Length of Stay</b> | <b>Patients (N)</b> | <b>Echo Rate among patients with this designated LOS (%)</b> | <b>Deaths (N)</b> | <b>Echo Rate among deaths (%)</b> |
|--------------------------------|---------------------|--------------------------------------------------------------|-------------------|-----------------------------------|
| 1                              | 13949               | 47.2                                                         | 1669              | 39.7                              |
| 2                              | 23843               | 65.7                                                         | 598               | 69.4                              |
| 3                              | 17508               | 73.9                                                         | 429               | 80.4                              |
| 4                              | 9721                | 77.6                                                         | 311               | 81.0                              |
| 5                              | 6432                | 78.8                                                         | 271               | 86.0                              |
| 6                              | 4823                | 78.4                                                         | 250               | 87.2                              |
| 7                              | 3807                | 79.2                                                         | 172               | 86.0                              |

LOS = Length of stay; echo = echocardiography;

eTable 4. Sensitivity Analysis Cohorts

| <b>Analysis</b>                                           | <b>Hospitals</b> | <b>Observed Echo Rate, median (IQR)</b> | <b>Risk Standardized Echo Rate, median (IQR)</b> | <b>Patients in Mortality Analysis (N) ^</b> | <b>In-hospital mortality, n (%)</b> |
|-----------------------------------------------------------|------------------|-----------------------------------------|--------------------------------------------------|---------------------------------------------|-------------------------------------|
| Original Cohort                                           | 397              | 72.4 (62.6 to 79.1)                     | 73.9 (62.8 to 81.1)                              | 95967                                       | 4613 (4.8)                          |
| Exclude Hospital LOS ≤ 2 days                             | 335              | 81.7 (74.2 to 88.1)                     | 79.1 (72.0 to 84.3)                              | 58175                                       | 2346 (4.0)                          |
| Exclude Transfers                                         | 348              | 76.3 (65.8 to 82.4)                     | 73.0 (64.1 to 78.6)                              | 70162                                       | 3633 (5.2)                          |
| Revascularization Subgroups                               |                  |                                         |                                                  |                                             |                                     |
| Cardiac catheterization with revascularization (CABG/PCI) | 287              | 75.8 (63.6 to 84.4)                     | 72.0 (61.4 to 80.6)                              | 52086                                       | 1462 (2.8)                          |
| Cardiac catheterization without revascularization         | 255              | 72.6 (62.5 to 81.3)                     | 70.0 (61.1 to 78.0)                              | 19710                                       | 810 (4.1)                           |
| No cardiac catheterization                                | 324              | 70.4 (62.1 to 78.1)                     | 68.7 (62.8 to 76.1)                              | 23044                                       | 2235 (9.7)                          |

LOS = Length of stay, IQR = Interquartile range, CABG = Coronary artery bypass graft, PCI = Percutaneous coronary intervention

^ Randomly selected 1 admission

eTable 5. Patient Characteristics and Unadjusted Outcomes By Use of Echocardiography When Excluding Length of Stay  $\leq 2$  Days

| Description                             | Total              | No ECHO             | ECHO                | Absolute standardized differences |
|-----------------------------------------|--------------------|---------------------|---------------------|-----------------------------------|
|                                         | n (%)              | n (%)               | n (%)               | %                                 |
| <b>Patients, n, (%)</b>                 | <b>60175 (100)</b> | <b>13200 (21.9)</b> | <b>46975 (78.1)</b> |                                   |
| <b>Age, Mean (SD), years</b>            | 68.2 (13.4)        | 67.9 (13.1)         | 68.3 (13.5)         | 3.5                               |
| Median (IQR), years                     | 68 (59 - 79)       | 68 (58 - 78)        | 69 (59 - 79)        |                                   |
| <b>Female sex</b>                       | 24354 (40.5)       | 5457 (41.3)         | 18897 (40.2)        | 2.3                               |
| <b>Race/Ethnicity</b>                   |                    |                     |                     | 7.2                               |
| White                                   | 41558 (69.1)       | 9229 (69.9)         | 32329 (68.8)        |                                   |
| Black                                   | 6694 (11.1)        | 1533 (11.6)         | 5161 (11)           |                                   |
| Hispanic                                | 3889 (6.5)         | 911 (6.9)           | 2978 (6.3)          |                                   |
| Other                                   | 8034 (13.4)        | 1527 (11.6)         | 6507 (13.9)         |                                   |
| <b>Marital status</b>                   |                    |                     |                     | 5.7                               |
| Married                                 | 26175 (43.5)       | 5869 (44.5)         | 20306 (43.2)        |                                   |
| Single                                  | 26124 (43.4)       | 5798 (43.9)         | 20326 (43.3)        |                                   |
| Other                                   | 7876 (13.1)        | 1533 (11.6)         | 6343 (13.5)         |                                   |
| <b>Insurance payor</b>                  |                    |                     |                     | 3.6                               |
| Medicare                                | 37881 (63)         | 8401 (63.6)         | 29480 (62.8)        |                                   |
| Medicaid                                | 5152 (8.6)         | 1083 (8.2)          | 4069 (8.7)          |                                   |
| Managed care                            | 9601 (16)          | 2152 (16.3)         | 7449 (15.9)         |                                   |
| Commercial-Indemnity                    | 2717 (4.5)         | 559 (4.2)           | 2158 (4.6)          |                                   |
| Self pay                                | 2583 (4.3)         | 558 (4.2)           | 2025 (4.3)          |                                   |
| Other                                   | 2241 (3.7)         | 447 (3.4)           | 1794 (3.8)          |                                   |
| <b>Gagne combined comorbidity score</b> |                    |                     |                     |                                   |
| Mean (SD)                               | 2.7 (2.8)          | 2.4 (2.8)           | 2.8 (2.8)           | 13                                |
| Median (IQR)                            | 2 (0 - 5)          | 2 (0 - 4)           | 2 (0 - 5)           |                                   |
| <b>Comorbidities</b>                    |                    |                     |                     |                                   |
| Hypertension                            | 49133 (81.7)       | 10973 (83.1)        | 38160 (81.2)        | 4.9                               |
| Hypothyroidism                          | 7953 (13.2)        | 1748 (13.2)         | 6205 (13.2)         | 0.1                               |
| Congestive heart failure                | 25043 (41.6)       | 4627 (35.1)         | 20416 (43.5)        | 17.3                              |
| Chronic pulmonary disease               | 15913 (26.4)       | 3652 (27.7)         | 12261 (26.1)        | 3.5                               |
| Renal failure                           | 16255 (27)         | 3511 (26.6)         | 12744 (27.1)        | 1.2                               |
| Obesity                                 | 11798 (19.6)       | 2617 (19.8)         | 9181 (19.5)         | 0.7                               |
| Deficiency Anemias                      | 14415 (24)         | 3147 (23.8)         | 11268 (24)          | 0.3                               |
| Valvular disease                        | 11485 (19.1)       | 1936 (14.7)         | 9549 (20.3)         | 14.9                              |
| Diabetes                                | 26814 (44.6)       | 6098 (46.2)         | 20716 (44.1)        | 4.2                               |

|                                      |               |               |               |                 |
|--------------------------------------|---------------|---------------|---------------|-----------------|
| Peripheral vascular disease          | 9321 (15.5)   | 2102 (15.9)   | 7219 (15.4)   | 1.5             |
| Depression                           | 6042 (10)     | 1422 (10.8)   | 4620 (9.8)    | 3.1             |
| Other neurological disorders         | 4724 (7.9)    | 978 (7.4)     | 3746 (8)      | 2.1             |
| Pulmonary circulation disease        | 4925 (8.2)    | 824 (6.2)     | 4101 (8.7)    | 9.5             |
| <b>Critical care therapies</b>       |               |               |               |                 |
| Intensive/Intermediate care unit     | 37234 (61.9)  | 7013 (53.1)   | 30221 (64.3)  | 22.9            |
| Vasodilators                         | 24186 (40.2)  | 5164 (39.1)   | 19022 (40.5)  | 2.8             |
| Noninvasive ventilation              | 6951 (11.6)   | 1067 (8.1)    | 5884 (12.5)   | 14.6            |
| Invasive mechanical ventilation      | 13857 (23)    | 2671 (20.2)   | 11186 (23.8)  | 8.6             |
| Vasopressors                         | 16249 (27)    | 3051 (23.1)   | 13198 (28.1)  | 11.4            |
| Arterial line                        | 3537 (5.9)    | 783 (5.9)     | 2754 (5.9)    | 0.3             |
| Intraaortic balloon pump             | 3654 (6.1)    | 494 (3.7)     | 3160 (6.7)    | 13.4            |
| Inotropes                            | 8940 (14.9)   | 1447 (11)     | 7493 (16)     | 14.7            |
| <b>Other cardiac tests/therapies</b> |               |               |               |                 |
| Nuclear imaging                      | 3691 (6.1)    | 557 (4.2)     | 3134 (6.7)    | 10.8            |
| Ventriculography                     | 1161 (1.9)    | 143 (1.1)     | 1018 (2.2)    | 8.6             |
| Cardiac magnetic resonance imaging   | 265 (0.4)     | 51 (0.4)      | 214 (0.5)     | 1.1             |
| <b>Procedures</b>                    |               |               |               |                 |
| Coronary artery bypass surgery       | 9344 (15.5)   | 2269 (17.2)   | 7075 (15.1)   | 5.8             |
| Percutaneous coronary intervention   | 25048 (41.6)  | 5306 (40.2)   | 19742 (42)    | 3.7             |
| Cardiac catheterization              | 44022 (73.2)  | 9284 (70.3)   | 34738 (73.9)  | 8.1             |
| <b>Acute Organ failure</b>           |               |               |               |                 |
| Respiratory                          | 8425 (14.0)   | 1105 (8.4)    | 7320 (15.6)   | 22.3            |
| Cardiac                              | 10242 (17.0)  | 1568 (11.9)   | 8674 (18.5)   | 18.4            |
| Renal                                | 14280 (23.7)  | 2347 (17.8)   | 11933 (25.4)  | 18.6            |
| Neurological                         | 4290 (7.1)    | 692 (5.2)     | 3598 (7.7)    | 9.8             |
| Hematological                        | 4861 (8.1)    | 886 (6.7)     | 3975 (8.5)    | 6.6             |
| Hepatic                              | 1228 (2.0)    | 134 (1.0)     | 1094 (2.3)    | 10.3            |
| Acidosis                             | 3834 (6.4)    | 539 (4.1)     | 3295 (7.0)    | 12.8            |
| <b>Outcomes</b>                      |               |               |               | <b>p-value*</b> |
| Length of stay†, mean (SD), days     | 6.5 (4.8)     | 5.6 (3.7)     | 6.8 (5.0)     | <0.001          |
| Total cost‡, mean (SD)               | 23006 (19437) | 18746 (14200) | 24201 (20511) | <0.001          |
| In-hospital mortality^               | 2346 (4.0)    | 334 (2.7)     | 2012 (4.4)    | <0.001          |
| 3 month readmission among survivors  | 12902 (22.3)  | 3194 (24.8)   | 9708 (21.6)   | <0.001          |

LOS = Length of stay; echo = echocardiography;

\*Generalized estimating (GEE) models accounting for patient clustering within hospitals

†Winsorized at 99<sup>th</sup> percentile

‡Winsorized at 1st and 99th pctl

^Randomly selected 1 admission

eTable 6: Sensitivity Analysis Excluding Patients with Hospital Length of Stay of  $\leq 2$  days

| <b>Unadjusted Outcomes<br/>(Quartile range %)</b> | <b>Quartile 1<br/>(4.2%-71.8%)</b> | <b>Quartile 2<br/>(71.9% - 79%)</b> | <b>Quartile 3<br/>(79% - 84%)</b> | <b>Quartile 4<br/>(84.2% - 94.6%)</b> | <b>p-value<br/>(Q4 vs. Q1)</b> |                            |
|---------------------------------------------------|------------------------------------|-------------------------------------|-----------------------------------|---------------------------------------|--------------------------------|----------------------------|
| Number of Hospitals                               | 83                                 | 84                                  | 84                                | 84                                    |                                |                            |
| Length of stay*, Mean (SD), days,                 | 6.5 (4.7)                          | 6.5 (4.8)                           | 6.6 (4.9)                         | 6.5 (4.9)                             | 0.40                           |                            |
| Total cost†, Mean (SD), \$ USD                    | 21930 (17940)                      | 21486 (18334)                       | 24773 (20882)                     | 24650 (20689)                         | 0.005                          |                            |
| In-hospital mortality^                            | 620 (4.1)                          | 667 (4.4)                           | 522 (3.8)                         | 550 (3.6)                             | 0.11                           |                            |
| 3 month readmission among survivors               | 3169 (21.8)                        | 3257 (22.3)                         | 3120 (23.8)                       | 3113 (21.4)                           | 0.62                           |                            |
| <b>Fully Adjusted‡ Outcome Effect Sizes</b>       | <b>Estimate/OR<br/>(95% CI)</b>    | <b>Estimate/OR<br/>(95% CI)</b>     | <b>Estimate/OR<br/>(95% CI)</b>   | <b>Estimate/OR<br/>(95% CI)</b>       | <b>p-value<br/>(Q4 vs. Q1)</b> | <b>Overall<br/>p-value</b> |
| Length of stay*, Mean (SD), days,                 | Referent                           | -0.08 (-0.31, 0.15)                 | -0.12 (-0.36, 0.11)               | 0.08 (-0.15, 0.32)                    | 0.31                           | 0.49                       |
| Total cost†, Mean (SD), \$ USD                    | Referent                           | 935 (-908, 2778)                    | 3380 (1526, 5235)                 | 4550 (2690, 6409)                     | <0.001                         | <0.001                     |
| In-hospital mortality^                            | Referent                           | 1.09 (0.91 - 1.30)                  | 0.92 (0.77 - 1.11)                | 0.90 (0.75 - 1.08)                    | 0.17                           | 0.26                       |
| 3 month all cause readmission among survivors     | Referent                           | 1.05 (0.96 - 1.15)                  | 1.10 (1.00 - 1.21)                | 0.99 (0.90 - 1.08)                    | 0.08                           | 0.78                       |

LOS = Length of stay; echo = echocardiography; Q1 = quartile 1; Q4 = quartile 4

\*Winsorized at 99<sup>th</sup> percentile

†Winsorized at 1st and 99th pctl

^ Randomly selected 1 admission

‡ Hierarchical generalized linear model models accounted for patient clustering within hospitals and adjusted for patient demographics, comorbidities, acute organ failures, hospital characteristics, and hospital interventional capabilities

eTable 7. Sensitivity Analysis Excluding Hospital Transfers

|                                                  | <b>Quartile 1<br/>(2.8%-64.0%)</b> | <b>Quartile 2<br/>(64.1% - 73.0%)</b> | <b>Quartile 3<br/>(73.1% - 78.5%)</b> | <b>Quartile 4<br/>(78.6% - 93.7%)</b> | <b>p-value<br/>(Q4 vs.<br/>Q1)*</b> |                                   |
|--------------------------------------------------|------------------------------------|---------------------------------------|---------------------------------------|---------------------------------------|-------------------------------------|-----------------------------------|
| <b>Unadjusted Outcomes</b>                       |                                    |                                       |                                       |                                       |                                     |                                   |
| Number of Hospitals                              | 87                                 | 87                                    | 87                                    | 87                                    |                                     |                                   |
| Risk-standardized echo rate,<br>Median (%)       | 56.3                               | 68.8                                  | 76.1                                  | 83.2                                  |                                     |                                   |
| Length of stay*, mean (SD),<br>days              | 4.4 (4.0)                          | 4.7 (4.3)                             | 4.6 (4.2)                             | 4.7 (4.3)                             | 0.51                                |                                   |
| Total cost, † mean, (SD), \$USD                  | 16294<br>(14039)                   | 16673 (14915)                         | 18723 (16316)                         | 19419 (16616)                         | <0.001                              |                                   |
| In-hospital mortality^                           | 998 (4.9)                          | 938 (5.7)                             | 863 (5.3)                             | 834 (4.8)                             | 0.48                                |                                   |
| 3 month all cause readmission<br>among survivors | 3690 (18.7)                        | 3176 (19.7)                           | 3414 (21.6)                           | 3258 (19.3)                           | 0.95                                |                                   |
| <b>Fully Adjusted‡ Outcome<br/>Effect Sizes</b>  | <b>Estimate/OR<br/>(95% CI)</b>    | <b>Estimate/OR<br/>(95% CI)</b>       | <b>Estimate/OR<br/>(95% CI)</b>       | <b>Estimate/OR (95%<br/>CI)</b>       | <b>p-value<br/>(Q4 vs. Q1)</b>      | <b>p-value<br/>(overall<br/>)</b> |
| Length of stay*, mean (SD),<br>days              | Referent                           | 0.12 (-0.07,<br>0.31)                 | 0.20 (0.01, 0.39)                     | 0.22 (0.03, 0.41)                     | 0.02                                | 0.09                              |
| Total cost, † mean, (SD) † \$USD                 | Referent                           | 485 (-881, 1851)                      | 2541 (1187,<br>3897)                  | 3090 (1736, 4444)                     | <0.001                              | <0.0001                           |
| In-hospital mortality^                           | Referent                           | 1.12 (0.95 -<br>1.31)                 | 1.05 (0.89 - 1.24)                    | 0.94 (0.80 - 1.24)                    | 0.44                                | 0.21                              |
| 3 month all cause readmission<br>among survivors | Referent                           | 1.06 (0.97 -<br>1.16)                 | 1.19 (1.08 - 1.30)                    | 1.01 (0.92 - 1.10)                    | 0.89                                | 0.001                             |
|                                                  |                                    |                                       |                                       |                                       |                                     |                                   |

LOS = Length of stay; echo = echocardiography; Q1 = quartile 1; Q4 = quartile 4, USD = United States Dollars

\*Winsorized at 99<sup>th</sup> percentile

†Winsorized at 1st and 99th pctl

^ Randomly selected 1 admission

‡ Hierarchical generalized linear model models accounted for patient clustering within hospitals and adjusted for patient demographics, comorbidities, acute organ failures, hospital characteristics, and hospital interventional capabilities





eTable 8: Sensitivity Analysis by Catheterization and Revascularization Subgroups

| <b>Cardiac Catheterization with Coronary Artery Bypass and/or Percutaneous Coronary Intervention</b> |                               |                                  |                                  |                             |                          |
|------------------------------------------------------------------------------------------------------|-------------------------------|----------------------------------|----------------------------------|-----------------------------|--------------------------|
| <b>Tertile of Risk-standardized ECHO rate (range %)</b>                                              | <b>Tertile 1 (3.5%-66.4%)</b> | <b>Tertile 2 (66.5% - 77.5%)</b> | <b>Tertile 3 (77.6% - 94.3%)</b> | <b>p-value (T3 vs. T1)*</b> | <b>p-value (overall)</b> |
| <b>Hospitals (n)</b>                                                                                 | <b>95</b>                     | <b>96</b>                        | <b>96</b>                        |                             |                          |
| <b>Risk-standardized echo rate, Median (%)</b>                                                       | <b>54.9</b>                   | <b>71.9</b>                      | <b>83.6</b>                      |                             |                          |
| <b>Unadjusted Outcomes</b>                                                                           |                               |                                  |                                  |                             |                          |
| Length of stay*, Mean (SD), days,                                                                    | 4.6 (4.5)                     | 4.8 (4.7)                        | 4.8 (4.6)                        | 0.94                        |                          |
| Total cost†, Mean (SD), \$ USD                                                                       | 20934 (16152)                 | 23629 (18857)                    | 24042 (18440)                    | <0.001                      |                          |
| In-hospital mortality^                                                                               | 510 (2.8)                     | 531 (3.0)                        | 421 (2.6)                        | 0.58                        |                          |
| 3 month all cause readmission among survivors                                                        | 2464 (13.6)                   | 2568 (14.9)                      | 2232 (14.2)                      | 0.45                        |                          |
| <b>Fully Adjusted‡ Outcome Effect Sizes</b>                                                          |                               |                                  |                                  |                             |                          |
|                                                                                                      | <b>Estimate/OR (95% CI)</b>   | <b>Estimate/OR (95% CI)</b>      | <b>Estimate/OR (95% CI)</b>      |                             |                          |
| Length of stay*, Mean (SD), days,                                                                    | Referent                      | -0.03 (-0.25, 0.16)              | 0.04 (-0.18, 0.26)               | 0.76                        | 0.84                     |
| Total cost†, Mean (SD), \$ USD                                                                       | Referent                      | 854 (-892, 2600)                 | 2402 (665, 4139)                 | 0.007                       | 0.02                     |
| In-hospital mortality^                                                                               | Referent                      | 1.04 (0.87 - 1.26)               | 0.89 (0.74 - 1.08)               | 0.25                        | 0.26                     |
| 3 month all cause readmission among survivors                                                        | Referent                      | 1.12 (1.01 - 1.23)               | 1.06 (0.96 - 1.17)               | 0.24                        | 0.09                     |
| <b>Cardiac Catheterization without Revascularization</b>                                             |                               |                                  |                                  |                             |                          |
| <b>Tertile of Risk-standardized ECHO rate (range %)</b>                                              | <b>Tertile 1 (9.3%-64.8%)</b> | <b>Tertile 2 (64.8% - 75.6%)</b> | <b>Tertile 3 (75.6% - 90.1%)</b> |                             |                          |
| <b>Hospitals</b>                                                                                     | <b>85</b>                     | <b>85</b>                        | <b>85</b>                        |                             |                          |
| <b>Risk-standardized echo rate, Median (%)</b>                                                       | <b>58.2</b>                   | <b>70</b>                        | <b>79.4</b>                      |                             |                          |
| <b>Unadjusted Outcomes</b>                                                                           |                               |                                  |                                  |                             |                          |
| Length of stay*, Mean (SD), days,                                                                    | 3.9 (3.5)                     | 4.2 (3.7)                        | 4.1 (3.5)                        | 0.04                        |                          |
| Total cost†, Mean (SD), \$ USD                                                                       | 11483 (10309)                 | 12663 (11329)                    | 12803 (11280)                    | 0.001                       |                          |
| In-hospital mortality^                                                                               | 286 (4.2)                     | 286 (4.3)                        | 238 (3.7)                        | 0.27                        |                          |
| 3 month all cause readmission among survivors                                                        | 1278 (19.6)                   | 1317 (20.8)                      | 1288 (20.8)                      | 0.18                        |                          |

| <b>Fully Adjusted† Outcome Effect Sizes</b>                 | <b>Estimate/OR<br/>(95% CI)</b>   | <b>Estimate/OR<br/>(95% CI)</b>      | <b>Estimate/OR<br/>(95% CI)</b>      |       |       |
|-------------------------------------------------------------|-----------------------------------|--------------------------------------|--------------------------------------|-------|-------|
| Length of stay*, Mean (SD), days,                           | Referent                          | 0.22 (0.03, 0.41)                    | 0.33 (0.14, 0.52)                    | 0.001 | 0.002 |
| Total cost†, Mean (SD), \$ USD                              | Referent                          | 546 (-473, 520)                      | 1471 (461, 2481)                     | 0.02  | 0.004 |
| In-hospital mortality^                                      | Referent                          | 1.11 (0.88 - 1.39)                   | 1.01 (0.80 - 1.28)                   | 0.94  | 0.64  |
| 3 month all cause readmission among survivors               | Referent                          | 1.10 (0.98 - 1.23)                   | 1.09 (0.98 - 1.22)                   | 0.12  | 0.19  |
| <b>No Cardiac Catheterization</b>                           |                                   |                                      |                                      |       |       |
| <b>Tertile of Risk-standardized ECHO rate<br/>(range %)</b> | <b>Tertile 1<br/>(6.8%-64.6%)</b> | <b>Tertile 2<br/>(64.6% - 73.7%)</b> | <b>Tertile 3<br/>(74.0% - 90.7%)</b> |       |       |
| <b>Hospitals</b>                                            | <b>108</b>                        | <b>108</b>                           | <b>108</b>                           |       |       |
| <b>Risk-standardized echo rate, Median (%)</b>              | <b>58.4</b>                       | <b>68.7</b>                          | <b>78</b>                            |       |       |
| <b>Unadjusted Outcomes</b>                                  |                                   |                                      |                                      |       |       |
| Length of stay*, Mean (SD), days,                           | 4.6 (4.0)                         | 4.7 (4.0)                            | 4.8 (4.3)                            | 0.35  |       |
| Total cost†, Mean (SD), \$ USD                              | 11011 (12434)                     | 12007 (12958)                        | 12902 (14388)                        | 0.02  |       |
| In-hospital mortality^                                      | 660 (8.9)                         | 849 (10.7)                           | 726 (9.4)                            | 0.53  |       |
| 3 month all cause readmission among survivors               | 1982 (28.3)                       | 1913 (26.2)                          | 1839 (25.5)                          | 0.006 |       |
| <b>Fully Adjusted† Outcome Effect Sizes</b>                 | <b>Estimate/OR<br/>(95% CI)</b>   | <b>Estimate/OR<br/>(95% CI)</b>      | <b>Estimate/OR<br/>(95% CI)</b>      |       |       |
| Length of stay*, Mean (SD), days,                           | Referent                          | -0.05 (-0.30, 0.20)                  | 0.16 (-0.09, 0.41)                   | 0.21  | 0.22  |
| Total cost†, Mean (SD), \$ USD                              | Referent                          | 317 (-770, 1404)                     | 922 (-168, 2012)                     | 0.10  | 0.24  |
| In-hospital mortality^                                      | Referent                          | 1.12 (0.94 - 1.34)                   | 1.02 (0.85 - 1.22)                   | 0.84  | 0.37  |
| 3 month all cause readmission among survivors               | Referent                          | 0.90 (0.81 - 1.01)                   | 0.89 (0.80 - 0.99)                   | 0.04  | 0.08  |
|                                                             |                                   |                                      |                                      |       |       |

LOS = Length of stay; echo = echocardiography; Q1 = quartile 1; Q4 = quartile 4

\*Winsorized at 99<sup>th</sup> percentile

†Winsorized at 1st and 99th pctl

^ Randomly selected 1 admission

‡ Hierarchical generalized linear model models accounted for patient clustering within hospitals and adjusted for patient demographics, comorbidities, acute organ failures, hospital characteristics, and hospital interventional capabilities
